# Supplementary material for: In Vitro Evaluation of Enteric-Coated HPMC Capsules—Effect of Formulation Factors on Product Performance
Source: MDPI journal article supplement (doi:10.3390/pharmaceutics12080696), 2020-07-23
Supplement: s1 [file s1]

# In Vitro Evaluation of Enteric-Coated HPMC Capsules—Effect of Formulation Factors on Product Performance

Maoqi Fu, Johannes Andreas Blechar, Andreas Sauer, Jozef Al-Gousous and Peter Langguth

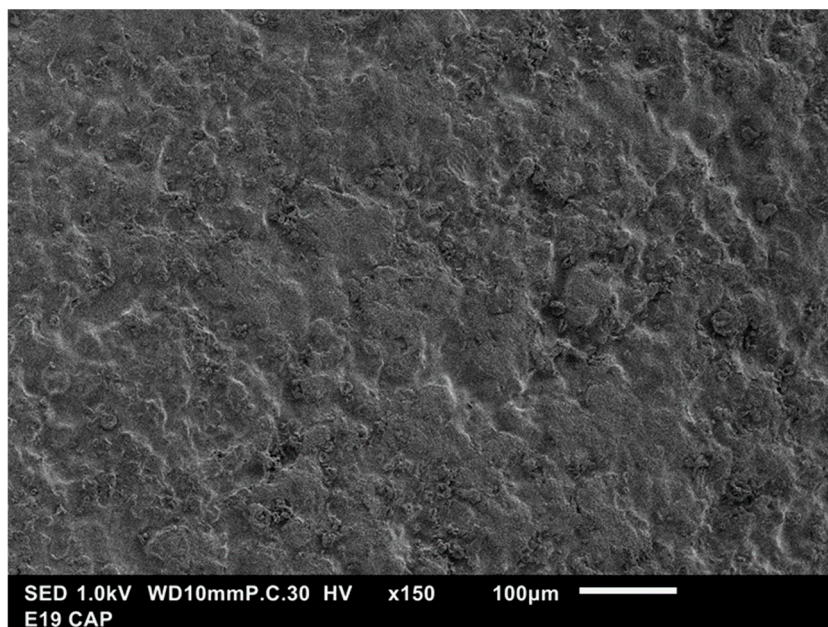

E19: C-A-P (33 % TEC/0 % Talc)

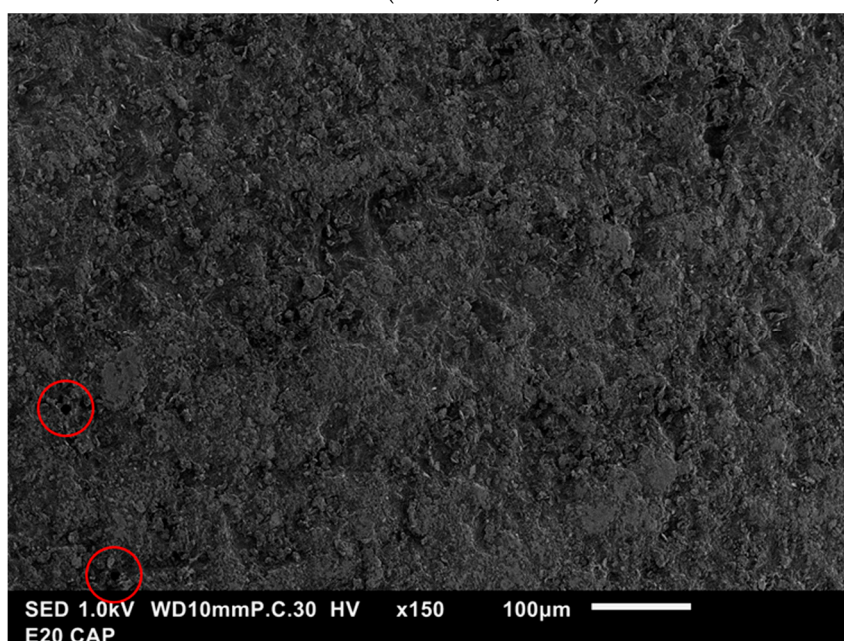

E20: C-A-P (33 % TEC/50 % Talc)

**Figure S1.** SEM images displaying the surface of the coated capsules. % talc is based on dry polymer weight.

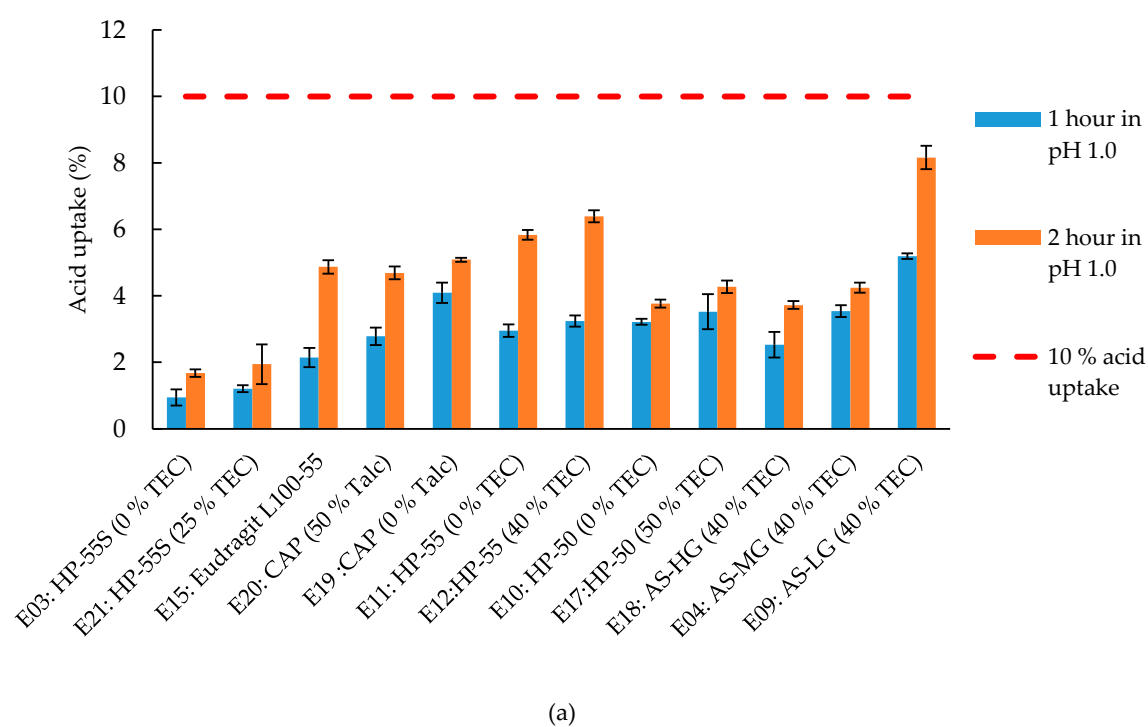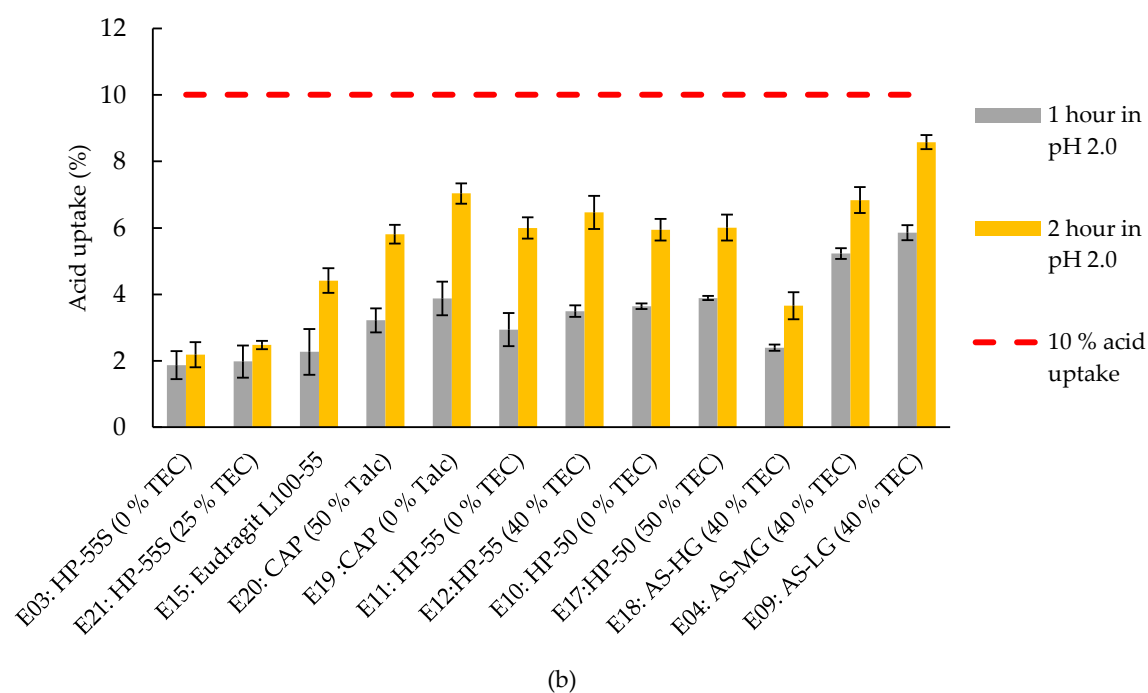

**Figure S2.** Acid uptake of enteric coated HPMC-capsules following incubation in 0.1N HCl (a) or 0.01N HCl (b). Horizontal line represents 10 % acid uptake. Given are average acid uptake (%)  $\pm$  SD; n=6. % TEC and % talc are based on dry polymer weight.

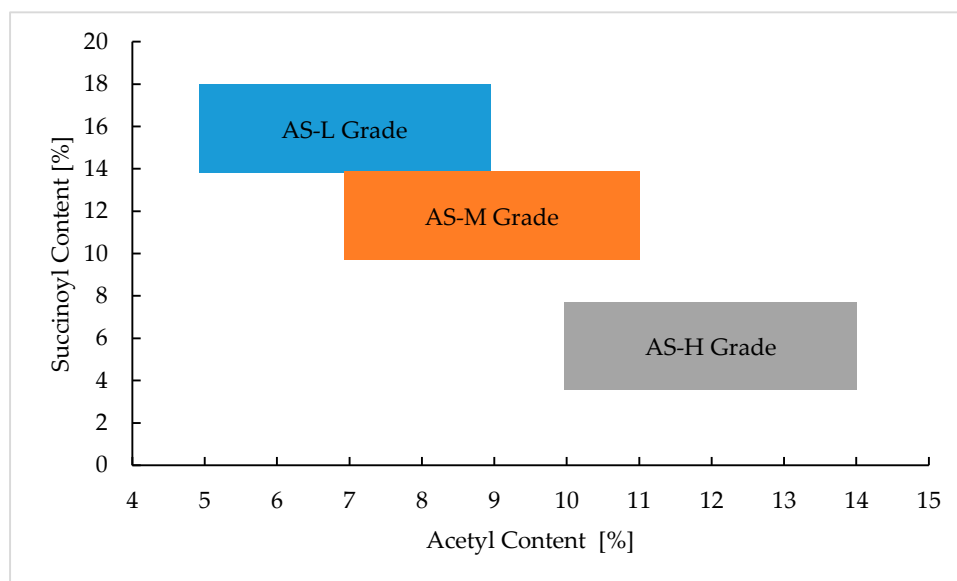

**Figure S1.** Acetyl- and succinoyl content of the different HPMCAS-grades [1,2].

## References:

1. Shin-Etsu Chemical Co. Ltd. Shin-Etsu Pharmaceutical Excipients Available online: <https://www.metolose.jp/en/pharmaceutical/> (accessed on 30 March 2020).
2. Ashland Chemical Co. Ltd. AquaSolve hydroxypropylmethylcellulose acetate succinate Available online: [https://www.ashland.com/file\\_source/Ashland/Industries/Pharmaceutical/Links/PC-12624.6\\_AquaSolve\\_HPMCAS\\_Physical\\_Chemical\\_Properties.pdf](https://www.ashland.com/file_source/Ashland/Industries/Pharmaceutical/Links/PC-12624.6_AquaSolve_HPMCAS_Physical_Chemical_Properties.pdf) (accessed on 10 April 2020).

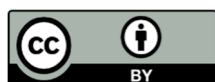

© 2020 by the authors. Submitted for possible open access publication under the terms and conditions of the Creative Commons Attribution (CC BY) license (<http://creativecommons.org/licenses/by/4.0/>).
